# Supplementary material for: Genome-Wide Identification and Characterization of Cucumber BPC Transcription Factors and Their Responses to Abiotic Stresses and Exogenous Phytohormones
Source: MDPI journal article supplement (doi:10.3390/ijms20205048), 2019-10-11
Supplement: s1 [file s1]

**A: Coding sequences of CsBPC genes.**

>Csa5G092910.1

ATGGATGACGATGCGTTAAACATGCGTAATTGGGGTTATTATGAGCCGTC  
CTTCAAAGGGCATCTCGGCCTGCAGCTCATGTCCACCATTCTGAGCGGG  
ACATGAAACATTTCTTACCAGGCCGTGATCCTTCTGTTATGGTTAATGCCA  
ATGGTTCCTTCCATCCTCGGGATTGCGTTGTTTCGGAAGCACCAGTGCATA  
TGAACATATGTGAGGGACAATTGGGGGGGTAACAGAGATAGGTTTCTTAAT  
ATGTTACCTACCAATCACAGCTATCCTGTTATGCCAGAACTTCAGGAGCT  
CACTCCTTGCAGATCTTGCAACCACCCTCTTCGTCGAGGGATGAAATAGC  
AGCAAGTAGAGTTGAAGAGCCTCCAGTGAAGAAGGAAGGTGGGAAAGCA  
AAGAAAAGACAGAGTAGTGAGGCTGGCCCCAAAGCCCCCAAAGCTAAAA  
AACCGAGGAAACCAAAGATACTAGCACGGCTGTTCAGCGTGTGAAACC  
ACCAAAGAAGAACATTGATCTTGTTATAAATGGGATTGATATGGACATCT  
CATGTATTCCAATCCCGGTTTGCTCTTGCACTGGAGCTCCTCATCAATGTT  
ACAGGTGGGGATGTGGCGGTTGGCAATCTGCTTGTTGTACTACCAACATA  
TCAACTTATCCTTTGCCCATGAGTGACAAAAGACGTGGGGCGAGGATAGC  
TGGGCGAAAAATGAGTCAGGGTGCGTTTAAGAAGGTACTTGAAAACTAG  
CAGCTGATGGCTATAATTTTGCTAACCCAATCGATTTGAGGACTCACTGGG  
CGAGACATGGTACGAATAAGTTTGTCACAATCAGGTAG

>Csa5G092920.2

ATGGATGGTGATGCTTTGAACATGCGTAATTGGGGTTACTATGAACCATCT  
TTGAAAGCGCATCTTGGACTGCAGCTCATGTCCACAATTGGTGAGCGAGA  
TGTGAAACATTTTATGCCTGGACGGGACCCGTCAGCTATTGTTAACATGA  
ATGCCGCATTTTCATCCACGGGAGTCTGTTGTTTCTGAAGCACCGGTAGCGA  
CGAACTGGGCGAGGGATGGTTGGATAAATCATAGGGACAAGCTTTTCAAT  
GTGTTATCCCCCAATACTAGTTATTCTCTGCTTGCAGAGACGTCAGCGGCA  
CAACCTTTGCAAATTTTACAGCCACTTGACACATCAAGAGATGAAATGGT  
TCTCAAGATTGAAGAACCACCTGTGAAGAAGGGAATAACAACCAAAG  
AAACGACAGAATGGAGGTGCTCCCAAACTCCGAAACCAAAGAAGCCTC  
GAAAGCCTAAAAATAATGATCCTTCGGTTCAACAGGTGAAGGCACCAAAA  
AAGAAGATGGAGCTTGTTATAAATGGGTTTGACATGGATATATCTAGTAT  
CCCAATTCCAGTATGTTCTTGCACTGGAACCTCCTCACCAATGTTATAGATG  
GGGCTATGGTGGCTGGCAATCAGCTTGTTGTACCACAAGTTTATCTCTACA  
TCCTTTGCCAATGAGTGAGAAGCGGCGAGGTGCAAGAATTGCTGGTCGAA  
AAATGAGTCAAGGTGCTTTTAAGAAGGTTTTGGAGAACTAGCAGCTCAA  
GGCTATAACTTTTCTAACCCAATTGATTTAAGAAGCCATTGGGCAAGGCA  
TGGGACCAATAAGTTTGTCACAATCAGGTGTACTAATCCTGTCTCAAATTA  
A

>Csa7G007860.1

ATGGATGATGGCCGTCAACATGAAAACGGGAGGCACAACTAGATTATTT  
CCGAGGGAGCTCCTCACCATGGAATATGGTGCCCCCAAATCATGTAAAGG  
AACCAAATGCCTTGGTCATGAATAAGAAGATCATGTCCATTATAGCCGAG  
AGAGATGCTGCTATTCGGGAACGGAATTTAGCACTATCTGAGAAGAAGGA  
GGCATTGGCTGCACGAGATGAGGCTCTCCGGCAGCGTGACGAGGCACTTG

TACAGCGTGATTCTGCGTTAATGGAAAGGGACAATGCCCTTGCTGCCCTT  
GAAATTCGTGACAATGCTTCTAACTTCCCTCTTGGTGGTGGGGTCCAACGC  
AAAACAAAGCGATTACACCATTTATCTAATCATATGCCGAACATATCTGA  
AACTTCCTATGGTACAAAAGACGTGCATATAACTGATGCCTTTCCAATTAC  
AGTTATAGCTTCTGAAGCTGTTAAGTCTCAGCAGGGAAAGCGAGCGAAGG  
ATAACAAGTTAGTTTCATCAAAGACATCAAGGCCGCCAAGGAAGAAGGTT  
GGCGAAGATTTGAATAGACATGCTGCCACCGATGGCACAAAATACAGAA  
CTGATTGGGATGGTCAGGACGTGGGTTTGAATCTTGTAAGTTTTGATGATT  
CTTCTATGCCAGCACCAATTTGTTTCGTGTACTGGGTTCGCAAGACAGTGCT  
ACAAATGGGGAAATGGGGGTTGGCAATCGTCTTGTTGTACCACCCATATG  
TCCATGTATCCACTTCCACATTTGGAAAACAAACGCCATGCTCGTATGGGC  
GGGCGGAAAATGAGTGGAAGTGTTTTTACAAAATTGCTTAGTCGGCTAGC  
AGCAGCAGGTCATGATCTGTCCGTACCAGTGGATCTTAAGGACCACTGGG  
CAAGACACGGTACAAATCGCTACATAACAATCAGGTAG

>Csa2G365700.1

ATGGATGACAGTGGACACCGTGAGAATGGAAGGCACAAACCAGATCAGT  
ATAAGTCAGCTCAGGGTCAGTGGATGATGCAGCATCAGCCCTCAATGAAG  
CAGATAATGGCAATTATGGCTGAAAGAGACGCAGCCATTCAAGAAAGAA  
ATTTGGCCCTCTCGGAGAAAAAGGCTGCACTGGCAGAGCGAGACATGGCA  
TATCTACAGCGAGACGCTGCAATTGCAGAGAGGAACAATGCCCTTTTGA  
ACGAGACAACGCCATTGCTACTCTTCAGTATCGTGAAAACCTCCATAAATA  
ACAATTTATCATGTCCACCAGGATGCCAAATTGCTAGGGGAGTGAAGCAT  
ATACATCATCCACAGCAGCAACACACACATCATGTGCCTCACATGAATGA  
GAATAATTACAATTCAAGAGAAATGCTTGCTTCCAACGACCCTTGCCCAA  
CATCCCCTGTCGCTTCTGAATCAACAAAGGCACGACGAAACAAGCGTCCA  
AAAGAGGGGAAAGACAGTCCCAACACCAAACAAGAAAGTTTCAAAAGGTC  
CACGGAAGGTCAAAAGGGAGGCTGAAGACTTGAACAAAATAATGTTGGG  
GAAGTCACAAGAATGGAAGGATGGAATTGGTATAATGAGTGCAGGTGAC  
GATCTTAATAAACAGTTGGTAGTATCAAAATCAGATTGGAAAGGCCAGGA  
TTTAGGATTAAACCAGGTTGCATTTGACGAATCAACCATGCCAGCTCCTAT  
ATGCTCCTGCACAGGAGTAATAAGACAATGCTACAAATGGGGGAATGGTG  
GATGGCAATCTGCATGTTGTACTACCACCCTCTCAATGTATCCATTACCTG  
CCGTTCCCAACAAACGACATGCTCGACTTGGCGGTTCGGAATAAGAGCGGA  
AGTGCTTTTAAACAACTGCTTAGCCGCCTTGACGCCGAAGGCCACGACCT  
ATCCGCTCCAGTTGATCTTAAAAATCACTGGGCAAAGCATGGAACAAATC  
GTTACATCACCATCAAGTAG

**B: The protein sequences of CsBPC genes**

>Csa5G092910.1

MDDDALNMRNWGYEYPSFKGHLGLQLMSTISERDMKHFLPGRDPSVMVNA  
NGSFHPRDCVVSEAPVHMNYVRDNWGGNRDRFLNMLPTNHSYPVMPETSG  
AHS LQILQPPSSSRDEIAASRVEEPPVKKEGGKAKKRQSSEAGPKAPKAKKPR  
KPKDTSTAVQVRVKPPKKNIDLVI NGIDMDISCIPIVCSCTGAPHQCYRWCGG  
GWQSACCTTNISTYPLMSDKRRGARIAGRKMSQGAFFKKVLEKLAADGYNF  
ANPIDLRTHWARHGTNKFVTIR

>Csa5G092920.2

MDGDALNMRNWGYEYPSLKAHLGLQLMSTIGERDVKHFMPGRDPSAIVNM  
NAAFHPRESVVSEAPVATNWARDGWINHRDKLFNVLSNPNTSYSLLAETSAAQ  
PLQILQPLDTSRDEMVLKIEEPPVKKGTKQPKKRQNGGAPKTPKPKKPRKPKN  
NDPSVQQVKAPKKKMELVINGFDMDISSIPIVCSCTGTPHQCYRWGYGGWQ  
SACCTTSLSLHPLPMSEKRRGARIAGRKMSQGAFKKVLEKLAAQGYNFSNPI  
DLRSHWARHGTNKFVTIRCTNPVSN

>Csa7G007860.1

MDDGRQHENGHRHKLDFRGS SSPWNMVPPNHVKEPNALVMNKKIMSIIAER  
DAAIRERNLALSEKKEALAAARDEALRQRDEALVQRDSALMERDNALAALEIR  
DNASNFPLGGGVQRKTKRLHHL SNHMPNISETSYGTKDVHITDAFPITVIASE  
AVKSQQGKRAKDNKLVSSKTSRPPRKKVGEDLNRHAATDGTKYRTDWDGQ  
DVGLNLVSFDDSSMPAPICSCTGFARQCYKWGNNGGWQSSCCTTHMSMYPLP  
HLENKRHARMGGRKMSGSVFTKL LSRLAAAGHDLSVPVDLKDHWARHGTN  
RYITIR

>Csa2G365700.1

MDDSGHRENGRHKPDQYKSAQGGQWMMQHQPSPMKQIMAIMAERDAAIQR  
NLALSEKKAALAERDMAYLQRDAAIAERNNALLERDNAIATLQYRENSINN  
LSCPPGCQIARGVKHIHPQQQHTHHVPHMNENNYNSREMLASNDPCPTSPV  
ASESTKARRNKRPKKEGKTVPTPNKKVSKGPRKVKREAEDLNKIMLGKSQEW  
KD GIGIMSAGDDL NKQLVVS KSDWKGD LGLNQVAFDESTMPAPICSCTGVI  
RQCYKWGNNGGWQSACCTTTLSMYPLPAVPNKRHARLGGRKMSGSAFNKLL  
SRLAAEGHDLSAPVDLKNHWAKHGTNRYITIK

**C: The 2 kb genomic DNA sequences upstream of the initiation codon.**

>Csa5G092910.1

CAGAACTACATACCAAACATAACAACAATAAGAGAAAGATTCTCAGGTTT  
TGAATCTTCCCAATAACAGTACTTGGATGGCGATTGTTCAACCACATCATC  
ATAATGGCTTGGAATGAAAACAACAAAATATCCCAAGACGAGAAACGA  
AATGGAAAAAAAAAAAAACAACAGAACAAATCAAAGCGCAACACAAACCTTA  
CAAGAGATGGGGAACACAATCAACAACAAAATTTTGCAACTAGACGCTA  
ATTGTGTAGATCGACGTTCTTTCTAGATATTAATTTTAACGATAAAAACAA  
GATTCCAGATCCAACATTTAATTCAATCAATCAAATAAATTAGGGTACAG  
ATCTCGTTTCCGCAGTCCACAACCTTGACATATTCAAATAATACGCAAAAA  
AAAAAGAAAGAAAGAAAGAAATCATCAAAATAAAAAACATGTTACATT  
GGCAACATCGAAATGAAAACAGAAGCCCTAAACAGAAATCCCCAAAAGT  
CAAAAACCCCTCAAAACATCAGATCTCCGACACCCATCATGCAGAAAGTG  
CAAAAGATTAGGGTTTCCACAACATCCAAATCTGAAAAACCACAGATCTA  
AGCAAAATTGAAGATAAAAAATCGGAGAATCGGAAAAACAAAAGAAAG  
AAGGAAATGCATATTTATATGGGGATGCAGATAGTACAAGAAGGACCCAT  
ATATTCAACTCGAGAGAGAGAAAGGGAGAGAGAAAGGGAAGAAGAGA  
GAGAAAGAGAAAGAAGGGGTAAGAGAGAGAGAGGACTTACTTGGGTGGGTG  
TAAACGGCTCTTTAGGGTTTTGCCCTTCTGGAGAGAGAGAGACAGAGACA  
GAGAGGAGAGAGGAGAGAGGAGAGAGGAGAGAGGAGAGAGGAGAGAGAG  
GAGAGAGGAGAGAGGAGAGAGGAGAGAGGAGAGAGGAGAGAGGAGAGAG

AGGAGAGAGAAACCTGAGAGAGAGAGAGAGAGAGAGAGCTAAAAATGG  
GTATCTATCAAAGAAGTAGTTGTCGCTTTAAAATAAGGAGAGAGGGGAAAG  
GGCAAACCAAAGCTATTCTATAAATTTCTTTCCCTTTTTTCTTTTCTTTGTTA  
ACTCTTTTTCTTTTTCTTTTTCTTTCTTTCTTTTTTTTTTCTTTTAAACCCCCA  
AAACAAATTTATTATATTATATAATTTATATACCATGTTTTTCATGTTTTCAT  
GTTTTGGAGTAGGCGAAATTTTCCACATCACACAACCCTATCTTTATAATT  
ATAATTATAATTATAATGCTTATTATTTATTTCTTCTTATTCTTATAATCTT  
ATTCTTTTGAGTTTTTGAGGGCTCCACATTCCATTTCTCTTCTTTCCCTTTTC  
TATTTATTCTATTGTCTAATCTATTCTTATCTACTTTCTCCTCTTCTTCATTC  
TATTCTTCCTCTTTCTCATTATCAACTCTAATTTTGTTTCTCCCTATTATATT  
ATTTCTTCTCTTTTTCTTTTTCTCCTTTCTACTTCATTTTCTTCCCAATCATC  
CTTTCCATTTAATCACATTCCATCACACTTTTTTTCAGTTTCTAATTATTTCA  
TTTCTCAACTTTTACCATTTTCTAAATTTTCAACATAAATAAACACATAGTT  
GTAAATACAATAACATAATGTACACAAATTTGTAAATATAGAATAAAGAG  
ACTATCAATGATACACTATAGAGCGTTAGTAGAGTTTTTTTTTGTAACTTTG  
AAACACCAAATCACATTTGGCATAGATGAAGTACCTTAGCGATGTTAATC  
CAATAGCCAAGAGCTTTAAATATAAGAAGGGGAAAAGAGATTGATCTGAC  
CTCTAATTTTGTAATATTGATATCATAGTAATGCGATTTC AATTATTAGAT  
GGTAGATAGGATTCTTTCATATAATCTTTGGTCTACAAATAAGCTGGTCC  
GTCTCTTTAGTAATAATGGACCTGTAGTGGGGTATAATATAGACTAATTAT  
CAGACTAATATGATTTCTTAACCATTGAAATACAAG

>Csa5G092920.2

TAGAACTACAGAGTGACACAATAAGCAGAGATTACAAGTTAGCTCAAGA  
AACTCCCATGTTCAAAACATAACCACCATAGAAATTAACACCAAGAAGGA  
AGAAAACAGTGTGCTTCAACTTCAAATAGCATCACTTCGATATTCCTACA  
AATTAAAGAACTGCCCTGTCCCCGCAATTAAGCCCTAAAGAAGACAAAAC  
TCATCAAATACACTTAAATTAAGTCTTTCCAAACCCAACAGTGAGGATTAT  
AAATTAATTCCAACAAGATCTCGATATAACCAAAATGGGTTGATTTAACA  
GCATACTGTTGATTGAAAAGTTCCAAAATTGGAAATTCCAGTATCCCACC  
AACCAACTAAAAATTAGGGGTTCTATCTAATTAAAGCCCCTTTTCAATATA  
CATATAGAAGGGTAAACATAAAGTAATCCGTTAACATAGATTTCCACCAT  
AAAACCCTAAAACGGAGACAACCTTAAAGATTCAA AATTCTCATCATACGG  
TTACATAAACA AAAAATCAGGGTTAGGAAATATATTGGAATAAACCGTCAG  
AAACCAAAGTTGATCAGAAACAAAAAGGAATGAAAAAATATAATAAAA  
AAGTGGACATAGAAGAAGTATATATAAAGAACAAAGGATAGCAATATTT  
ATATATGAAAATGTCAGTAATGGTCAAAGAGCACAAAGAAGGACCCCAT  
ATATTGAGAGATGAGAGAGAGAGAGGAGACAAAGACAGAGAGAGAGAG  
AGAGAGAAGGAGGAGGAGGAGAGAGAGAAAACCTTACTTGGGTGGGTGTAAA  
CGGCACTTTAGGGTTTTTTGCCGGAGGAGAGAGAACTGAAAGGGAGAGA  
GAGAGAGAGAAAGGGAAGGAAAAGGAAAAGAAGGAGAAAAAGTGGGTG  
AAAAAGGAAAGGGTTCTTTTGATATATATATATATAATATGTTATTTATCT  
TATGAGTTTATGAGTACGAGAGAAATAGAGAAGGTTGTGACAAAAATCTT  
CCAACCTAAATTAATTTATCATTATCTTTATGGGATCAATTCTTTTCTCTTT  
TCTCTTTTTTCTTTTTTTGAAGATATCATTATTTGATTATTGATTTTGGTGG

AAGTTTGATCAAAGAGAATGTTTTGGTTGCATTTACTCTCCCTTTTAAATA  
TCTTTTTTTTCTTTCTTTTCTTTTTCTAATTCTTATTTTAATTTTCATTTGC  
AACTTAATTCACTTAATATTAGTTTCTAGTGAGTTGTGCATCTCTCCATT  
GCGCCAATTTTAAATTTTAAAATATAGTATTGAATTTACTATCCAAACCA  
ATCATTTTTATATTTTTATTTTTATCACTACATAAAAATCCAACAATTCTTAA  
CCTCAAATAAATGTCGAAAATTAATAGGTCGTGATATCCTACTATTTTCTAGA  
CACTTGGAAGTACTGTCAGTATACGGGTGCAATCCCAACGTCTTAATTAT  
AACGTCGGAAGTACTGATCCACTAATATATTTTTTTAAAATTTTATTCACGTTTT  
GCCGACGTAATGAAAAAACGACCGTGAAAGTAAAAAGATTATTTAATTAT  
TTAACTTCTTCTGACAAGTAAAGTAAAGTAAAGTAAAGTAAAGTAAAGTAA  
TTATTTGATTATTCCTTTTCCCAATATCTAGGCAAAATTCGTCACAAAA  
AAATGGAAATAGTTAATTTAGTTGTTTAACTCTCTTGGATGTCTACGTTTA  
CTGTGTCGGAGAAAATTAATAGTTAATTAAATTGTTTAAATTTTCTTGAC  
GTCATGCAGGAACGTCTTGAAAACCTCAACTAATATCGACGCCATTAGTG  
AAATATCAACATGGGTTGAACTATCTCCAATGTTTCACTTTATGACATTG  
GAAATAACGTGCATTTTCAACATTTTGTAGATGCATTGAAAAATCCTTTGT  
TCATTTTAAGTTATCTCCAATATCAAAGGTTTGTGGTACTTAGTAAGACAA  
TAAGAGTGAAGGAACATGAAGACAATAGAAAT

>Csa7G007860.1

ATCCAAAGATTTTCTTAAAATTAATAATATTTTTATTCTCATCAACTT  
CTTTTTAAATTTTTTTTAAATAATTTAAGAAAAAGAAAGAAAGAAACGA  
GGGGCGAAAACAACTTCAAAACGGCAAAGGAAAAACGCGTTTTAGGGG  
GTTAGACTTTTAATCCAGTTTAAAGGAAGAAAGAAAAAATAATATA  
TTTTTCCTTACAAACGACGTCGTAAGGAATTGGAAGCCAACGGGGTCGTT  
TTCGGATGAGAATACACATCAAAACGAAGAAGAAGGAAGGAAGGAAGGA  
AGGAAGGAAGTAGGCTTGCTACTCACCACCATTCTTCTCTCTCAGTTCTC  
TCTTCAATCTCCGACTCTATCAAATCTTCACCAAATCTCTTCCAAATTCTTT  
TCAGGTCAGCATTCCTTCTTCTCCATTGCATCTGTTGTTGTAAGTTTTCCTT  
TCCTCCATTCCAATTCTCTCTTTCTTCTCATCATCCTCCATTTTCCCCCT  
CTCCCTTTTCAAATTTCTTCTCTCTCTCTCTCTCTCTCTCTCTCTCTCTCT  
ATCCTTTTCTCACTCCTACCTCGCCTATATTCTTTTTCTCCTCCTCTCTCT  
GTTCTTCTCTCTTTCATGTTTTTTTCCCTCCTTTTAGGTTTTGTTTCGAGGAGA  
TTGGGCTGCTGCTCCTTTTTTTTTTTTCGGTATGATTTATTCCTTTTTTTGAA  
TCAACTCCTATTTTTAGCATTTTTTTGTGGTAAATTTTACTGTCTTTGTATG  
TTAATGCCAAGGAAATAGTGGAACATATGTGTGTGTGTGTGTGTGTGTG  
TGTGTGAATGTGAGTGTCAATGTCATTTCTCTATATTTTGTAAAGTTTTTAA  
CATTTTTTGTTTTTATTTGTTTAGCTTGTGTTATATGTTTTGTGTCTAGAGTT  
TTGAGGAAATTGTTGTGGACTTAGTTTTGGTTGGACTTTTATTTATGAGTA  
TTGTTTCTATGTTTGGTAAAAGATTGTTTATTTATGTTTTTGTAAAGTAAAG  
ATGAGTAAATAATGGTTACGAGTCTGACTGTTGATTGTTTTTTTTATTTTAA  
TTTATGCCGTTTTTGTTCGTCTTGTGTTTCAGAGCTGTGAAGAAATTGGTAT  
AGACTTGAATAAGTGAAGTTGATTATCCCTTGATGTTATAAGTAAGATGCT  
GCTTCGGAATATGACCTTAAAATTTCTTCGGTGGATGGTAATGACCAGCTT  
TCATTAACTTAAGCTGAAATGGAAGAACCTACATACTCTTAACATGGTTT

TAAAGAGACTCAAATTGCCAGACCAGGCTTCTGTTTATGCTTTATCTTTGA  
AAGAGCAATCCAATGAGAACCATTAAAGATGTATGAAAGTTTGATTGATT  
AATGGCGTACTTGAATGTTTGTCTCCTATTTTAATTTGTGTCCATTATTTGG  
ACAATCATAGTATTGTAGGCTCTTTTTTTCTTAGCTCTTGATAGTAAGTGTT  
TGAATTGATCCCCCAAGATATGCTGGATGTGACCGTGCTGGTACCTCCTGT  
TATCCAAACTTATGATCTTTGCTTTGTCAATGAAAAGAGACTGTATCATTT  
TTAATTATTTGCTTGATGTAGCTGAATGAATTCATCGTAGTGTGGGGTGAT  
TCCAATCTTCTTTATGATTTTACTGTAGTTCTAACATGTCTTTATATTGACC  
AAAAGATAGTCTCCTTTCAGTTTAGGTTAATTAATGTAGGTTCAATTTTTC  
TTTTAACTTTTTGTGACTTTGAACTACCACTCATTCTTAGTTGTTGAGGTT  
TTATTTCACTTTAGTTTCTATCTTTCCTGTTATGCCTTGTTGATGCTTCCCAT  
TATCTAAATCTTGCTGATGTTTTCAATTTTCATGTAAAATCAGAGTAGATGA  
TTATGAGTTGGAAGGTTAGTTGATGGTGAAATTTTTTTGAATCAAACCTCCA  
ATCAGCATTCTGAATCCATTCGCCTTGGTAGTTATTTTTTGGGACT

>Csa2G365700.1

AAAAGAAAAAAAAGAAAAAGAAAAAGAAAAAGGAAAGAGAGAGAGA  
GAGAGAGAGAGAGATTCCCTTTGTCCCTCTGCTCTGCTTACAACCTGTTCTTT  
CCACAGATTTTCAATCCTTTTCTTTTCTCCATCTTCATCTCTTTTCCTTTTTC  
TTCTTCTTTCTTCAGTTCTTCATCTCTCCTTCTCACTGGTAAGCTTTCATTTTC  
TCTTTCCTTTTGATTTCTTATATGTTTTTCCCTTTTCCCTAATCCCACCTTTC  
TATTTTGGTTTTTTTATTTCCATTTCCCTGCTTTTTTACTCCTTTGAATCATATCT  
GTTTCTATCACTTCTTCCTTATTCTATCTTTCTCCTGCTTACTCTCACTCCAA  
TCTTTGTGAAATCTGCTTTAATTTACTGCTTATTTGCTGTTTTTGAAACTTG  
CTGTGTGATTTGTGGCGTTTTTTTTTCTTCTAGGGTTTCGTTTGCTTCTGGTT  
GTTATTGTTCTTTTTAGCTCAGAATTTGTTGTGGGGTTGTTTTATTTTTTCGTT  
TTGAGTTGAGGGTTCTGCTTTAAGCTCACGGCTCGAAGCTGAAAAGTTGA  
CTCCCGTTTACTTTCCCTGGTTATAGTAATTAAGAATCGGATCTTTATGAG  
TTTTGCTTCTTCATAATCTTTTAGCCCTTTTTGCCCCTATTTTTTCAGCTGGTT  
TGAGCTCGTTGAAACCGATGAATACGCTTTTTGTGACTGCTTTGACTTGAT  
TGTTTTTGTCTGTATCTACTGAATTTTTGTACTGGAACTAAGGCAGGAGAG  
GGAAATTACAGAAACATTGTTGGGGTTTATTTATTTTTGAAGTGTGATTAA  
TTTATGTTGAATTTGATTGTTTAGATGATCTGATGGAGGATGAGATGGGGA  
AGGTGCGTCAGCCATTTGAGCTGACTGGAGGTCGAAATTTCTAACGATGG  
TTTCTTAAGTGGATTCTTCGTTTGGTCTTCTGATTCCAGGTGAAGTATCTAC  
TGCTCCGAACTCACGTACATCTTGTTTCTGCTTATGATTACTTGCTTAGACT  
GTGGATAAAGTGCTCTGCTGCTTAACTGTATTACTTCATACCTGAGCTTTA  
ATTCCACAAGACAGTTATTTCTCTCTCTCGATTGTTTATTGTTGCCCAGAA  
GTTGTAGAGGTGTTTTTAGATCTTCCCTTTTATGGATGTGTATATGTATACA  
ATTTTTGCAACCCTAGTTGGTCAGGTCGGTTAGTGTCTTCTTTGTTTGGTCA  
GAATTTTGAATGTTTCTCTTAATGGAAGTCAATAGACTTAACTTGTGGTAG  
TAACTTGTGTATACAATAAAGGGAGTGATGCGTCCGTTGTTGGAATGATG  
TTGTATTGATTGCCACCTCCTCGATCAATTAGAGTTGGTTCTTTAAGGGGT  
TATATTTGGCTTTGGCTTGTAGTTTTATCTGAATTTTTTATTTGTGCCACCG  
GAGTTTGATTTTGAATTTGAATAAACTAATATTATTCTCTTTATTTAGAGA

GTGAACGGTATCAAACATCAATGTCAAGAAAAGTGAAATTACATCGTCAA  
TTTATTTGAAAAATAAAGTTATAAACACACTTTCCTCCTAAGTTTCTTTA  
ACTTTGACTTTGTTCTTAGAATTTAAAAATGAGAGAAAGTAAATATAAATT  
TCAAAGATAAACTAAAATAAACTATTATAAGTTGGAGCTCCGTTTGGGA  
TGATTGTTCTCACATTTTTCTTTTACTCATGGTTTTGATTGTTGGCTCATTTT  
TAATAACAAAAATATATATTTTTTGATTTTCTCTTTTTGCGCTGAATAGAAG  
TATTTCTTTTGAGGTTACCAATATGTGAATATTTTATTTGAGACAGCATTT  
TCTTAGCTTGCATTCTTTCTCTTCATAGTGTATATCATAGTTAGGTAACATA  
TTGGTAACATTTAAGCATATGAATGATTGCCATTTTGTTCAGTGGAGCT  
TTTTCATTACTGTATCTGTGTTGGTTATTCGTTTTGGAGTCACAA
