# Supplementary material for: Genome-Wide Identification and Characterization of Cucumber BPC Transcription Factors and Their Responses to Abiotic Stresses and Exogenous Phytohormones
Source: Int J Mol Sci. 2019 Oct 11;20(20):5048. doi: 10.3390/ijms20205048 (PMC6829308; doi:10.3390/ijms20205048)
Supplement: Supplementary file 1 [file ijms-20-05048-s001.zip › Additional file 2.xlsx]

## Sheet: Sheet1
Primers used for expression patterns analysis
Primer name		Primer Sequence
CsBPC1-F		GAAGAGCCTCCAGTGAAGAAG
CsBPC1-R		CTGAACAGCCGTGCTAGTAT
CsBPC2-F		CCAGTATGTTCTTGCACTGG
CsBPC2-R		CCAGCAATTCTTGCACCTC
CsBPC3-F		CCATTATAGCCGAGAGAGATGC
CsBPC3-R		CGAATTTCAAGGGCAGCAAG
CsBPC4-F		CATGGCATATCTACAGCGAGAC
CsBPC4-R		CCCTAGCAATTTGGCATCCT
CsActin-F		TTCTGGTGATGGTGTGAGTC
CsActin-R		GGCAGTGGTTGTGAACATG

## Sheet: Sheet2
Primers used for amplification of CsBPC2 CDS sequence
Primer name		Primer Sequence
CsBPC2-CDS-F		GGACTCTAGAGGATCCATGGATGGTGATGCTTTGAACAT
CsBPC2-CDS-R		GTCACCAATTCACACGTGTTAATTTGAGACAGGATTAGTACACC

## Sheet: Sheet3
Primers of Hyg used for PCR confirmation
Primer name		Primer Sequence
Hyg-F		TTCTACACAGCCATCGGTC
Hyg-R		TGTCCTGCGGGTAAATAGC

## Sheet: Sheet4
Primers for qRT-PCR confirmation in transgenic tobacco plants
Primer name		Primer Sequence
CsBPC2-F		CCAGTATGTTCTTGCACTGG
CsBPC2-R		CCAGCAATTCTTGCACCTC
NtActin-F		TTAAAGAGAAACTGGCATATGTTG
NtActin-R		GCCCATCTGGTAACTCATAGC
